1 **Corner flows induced by surfactant-producing bacteria *Bacillus subtilis* and**  
2 ***Pseudomonas fluorescens***

3

4 Yuan Li,<sup>a,b</sup> Joe Sanfilippo,<sup>c</sup> Daniel Kearns,<sup>d</sup> Judy Q. Yang<sup>a,b,#</sup>

5

6 <sup>a</sup>Saint Anthony Falls Laboratory, University of Minnesota, Minneapolis, Minnesota, USA

7 <sup>b</sup>Department of Civil, Environmental, and Geo-Engineering, University of Minnesota,

8 Minneapolis, Minnesota, USA

9 <sup>c</sup>Department of Biochemistry, University of Illinois at Urbana–Champaign, Urbana,

10 Illinois, USA

11 <sup>d</sup>Department of Biology, Indiana University, Bloomington, Indiana, USA

12

13 Running Head: Bacteria-generated corner flows

14

15 #Address correspondence to Judy Yang, judyyang@umn.edu.

16 Judy Yang and Yuan Li conceived the idea, designed the research, and wrote the paper.

17 Yuan Li designed and conducted the experiments. Joe Sanfilippo and Daniel Kearns

18 contributed strains and contributed to the research idea and writing.

19

20

## 21 **Abstract**

22       Mechanistic understanding of bacterial spreading in soil is critical to control  
23 pathogenic contamination of groundwater and soil as well as design bioremediation  
24 projects. However, our understanding is currently limited by the lack of direct bacterial  
25 imaging in soil conditions. Here, we overcome this limitation by directly observing the  
26 spread of bacterial solution in a transparent chamber with varying corner angles designed  
27 to replicate soil-like conditions. We show that two common soil bacteria, *Bacillus subtilis*  
28 and *Pseudomonas fluorescens*, generate flows along sharp corners ( $< 60^\circ$ ) by producing  
29 surfactants that turn nonwetting solid surfaces into wetting surfaces. We further show that  
30 a surfactant-deficient mutant of *B. subtilis* cannot generate corner flows along sharp corners,  
31 confirming that the bacteria-generated corner flows require the production of bacterial  
32 surfactants. The speed of biosurfactant-induced corner flow at the sharp corner is about  
33 several millimeters per hour, similar to that of bacterial swarming, the fastest mode of  
34 known bacterial surface translocation. We further demonstrate that the bacteria-generated  
35 corner flow only occurs when the corner angle is less than a critical value, which can be  
36 predicted from the contact angle of the bacterial solution. Furthermore, we show that the  
37 corner flow has a maximum height due to the roundness or cutoff of corners. The  
38 mechanistic understanding and mathematical theories of bacterial spreading presented in  
39 this study will help improve predictions of bacterial spreading in soil, where corners are  
40 ubiquitous, and facilitate future designs of soil contamination mitigation and other  
41 bioremediation projects.

## 42 **Importance**

43       The spread of bacterial cells in soil regulates soil biogeochemical cycles, increases the  
44 possibility of soil and groundwater contamination, and controls the efficiency of many  
45 bacteria-based bioremediation projects. However, mechanistic understanding of bacterial  
46 spreading in soil remains incomplete due to a lack of direct or in-situ observations. Here,  
47 we simulate confined spaces of soil using a transparent material with similar  
48 hydrophobicity as hydrocarbon-covered soil and directly visualize the spread of two  
49 common soil bacteria, *Bacillus subtilis* and *Pseudomonas fluorescens*. We show that both  
50 bacteria can generate vertical flows along sharp corners of the transparent chamber. The  
51 velocity of the bacterial corner flow is several millimeters per hour. We further demonstrate  
52 that the corner flow was generated by bacteria-produced bio-surfactants, which are soap-  
53 like chemicals and turn nonwetting solid surfaces into wetting surfaces. Our results will  
54 help improve predictions of bacterial spreading in soil and facilitate designs of soil-related  
55 bioremediation projects.

## 56 **Introduction**

57       Bacteria play a major role in soil carbon decomposition and the movement of bacterial  
58 cells has a large impact on regulating soil biogeochemical cycles<sup>1,2</sup>. In addition, the  
59 transport of pathogenic bacteria from fecal waste to drinking water reservoirs poses risks  
60 to human health<sup>1</sup>. Furthermore, many soil bioremediation projects rely on the injection of  
61 contaminant-degrading bacteria such as petroleum-degrading *Bacillus* sp. to decompose  
62 contaminations, and accordingly, the spread of bacteria impacts the remediation  
63 efficiency<sup>3-5</sup>. Mechanistic understanding of how bacterial cells spread in soil is needed to

64 predict soil biogeochemical cycles and improve soil quality, yet such understanding is  
65 currently incomplete.

66 In most current studies, bacterial spreading was attributed to advection and  
67 hydrodynamic dispersion<sup>6,7</sup>, filtration, adsorption, and desorption<sup>8</sup>, as well as bacterial  
68 motility<sup>9</sup>. Many studies also show that surfactants can facilitate bacterial transport in  
69 porous media<sup>10,11</sup>. In addition to the above mechanisms, a recent study<sup>12</sup> discovered a new  
70 bacterial spreading mechanism that *Pseudomonas aeruginosa*, a major human pathogen  
71 and bacterium found in soil, can self-generate flows along sharp corners and spread in a  
72 synthetic soil by producing biosurfactants that change the wettability of solid surfaces.

73 In this study, we investigate whether biosurfactant-enabled bacterial spreading is a  
74 conserved mechanism of soil bacteria. We hypothesize that biosurfactant-based bacterial  
75 spreading mechanism is common in soil because many soil bacteria produce surfactants,  
76 including *Bacillus subtilis*<sup>13,14</sup>, *Pseudomonas fluorescens*<sup>15,16</sup>, *Pseudomonas putida*<sup>17,18</sup>.  
77 This study focuses on *B. subtilis* and *P. fluorescens*, two species of plant growth-promoting  
78 rhizobacteria<sup>19</sup> that are ubiquitous in soil<sup>20,21</sup>. The surfactin produced by *B. subtilis* and the  
79 rhamnolipid synthesized by *P. fluorescens* are the most analyzed biosurfactants due to their  
80 application in bioremediation of diesel-contaminated soil<sup>22</sup> as well as their biodegradability  
81 and low toxicity<sup>23</sup>, and the surfactin is also known for antimicrobial and antifungal  
82 activities<sup>24–26</sup>.

83 Here, we show that surfactant-producing bacteria, *B. subtilis* and *P. fluorescens*, can  
84 generate flows along sharp corners of a transparent chamber made from  
85 polydimethylsiloxane (PDMS), which has similar surface properties as hydrocarbon-

86 covered hydrophobic soil. We further show that corner flow is surfactant dependent and  
87 the contact angle of the solution dictates the critical corner angle for the corner flow. Finally,  
88 we show that the maximum height of corner flows generated by bacteria is controlled by  
89 the corner geometry, i.e., the roundness or cutoff of the corner, and can be predicted by the  
90 capillary theory developed for pure and homogeneous wetting liquids.

## 91 **Results**

### 92 **Corner Flows at Sharp 30° Corners generated by *B. subtilis* and *P. fluorescens*.**

93 First, we investigate whether similar to *Pseudomonas aeruginosa*<sup>27</sup>, typical surfactant-  
94 producing soil bacteria *Bacillus subtilis* and *Pseudomonas fluorescens* can generate corner  
95 flows. We consider three strains: *Bacillus subtilis* 3610 (Wild-type and surfactant-  
96 producing strain), *Bacillus subtilis* DS1122 (surfactant-deficient mutant) and  
97 *Pseudomonas fluorescens* PF15 (surfactant-producing strain). To test whether these strains  
98 generate corner flows, we grow bacteria in M9 solution in a transparent  
99 polydimethylsiloxane (PDMS) chamber with four corners, 30°, 60°, 90° and 120° (as  
100 shown in Fig. 1A). Afterward, we visualized the spread of the culture medium stained with  
101 fluorescein along these four corners using a digital camera over a 24-hour period. Fig. 1B  
102 shows a presentative image of the bacterial solution in the chamber at the time of  
103 inoculation ( $t = 0$  h). As the bacteria grew in the chamber over time, we observed that  
104 surfactant-producing bacteria *B. subtilis* 3610 (WT) and *P. fluorescens* PF15 generated  
105 corner flows at the 30° corners, as shown in the time-lapse images of the bacterial solution  
106 at the 30° corners in Fig. 2. The existence of corner flows at other corner angles and the  
107 critical corner angle to generate corner flows will be discussed in the following sections.  
108 In contrast to these two surfactant-producing strains, surfactant-deficient mutant *B. subtilis*

109 DS1122 (defective in surfactin), did not generate flow at the 30° corners. These  
110 observations confirmed our hypotheses that surfactant-producing bacteria, such as *B.*  
111 *subtilis* 3610 (WT) and *P. fluorescens* PF15, can generate flows along sharp corners by  
112 producing surfactants, while surfactant-deficient bacteria like *B. subtilis* DS1122 cannot.

113       Second, we investigate the speed of corner flows at the sharp 30° corner generated by  
114 the surfactant-producing bacteria. We plotted the heights of the tip of the corner flows  
115 versus time for these three strains shown in Fig. 3. For *B. subtilis* 3610, the corner flow  
116 started at  $t = 2$  h and ended at  $t = 18$  h with a maximum height of 9 mm. For *P. fluorescens*  
117 PF15, the corner flow started at  $t = 8$  h and ended at  $t = 15$  h with a similar maximum height,  
118 about 9 mm. The average climb speeds were 0.6 mm/h and 1.3 mm/h for *B. subtilis* and *P.*  
119 *fluorescens*, respectively. The speed of the bacterial corner flow, on the order of mm/h, is  
120 similar to bacterial surface swarming, the fastest mode of known bacterial surface  
121 translocation<sup>28</sup>.

122       Further, we show that bacterial cells transport with the bacteria-generated corner  
123 flows. We sampled the *B. subtilis* 3610 solution at the tip of the corner flow after 24 hours  
124 and diluted it with abiotic M9 solution by about 50 times. Then, we imaged the bacterial  
125 sample under a Nikon C2 plus Confocal Laser Scanning Microscope. As shown in Fig. S2,  
126 *B. subtilis* 3610 cells exist in the tip of the corner flow, suggesting that surfactant-producing  
127 bacteria can indeed make use of the corner flow mechanism to spread.

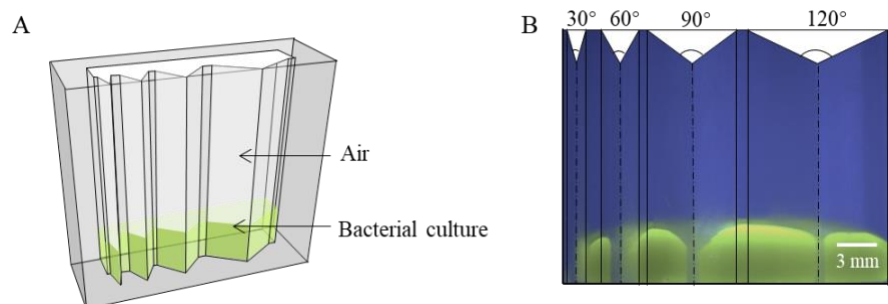

128

129 **FIG 1** (A) Schematic of experimental corner flow experiments. Bacterial solution (green) was placed  
130 in the PDMS chamber with four corner angles. The green color is due to the addition of 0.005% (w/v)  
131 fluorescein sodium salt for visualization purpose. The corner angles are  $30^\circ$ ,  $60^\circ$ ,  $90^\circ$  and  $120^\circ$  from left  
132 to right. (B) Image of the bacterial solution in the chamber at  $t = 0$  h, which is defined as the time when  
133 the bacterial solution was transferred into the chamber.

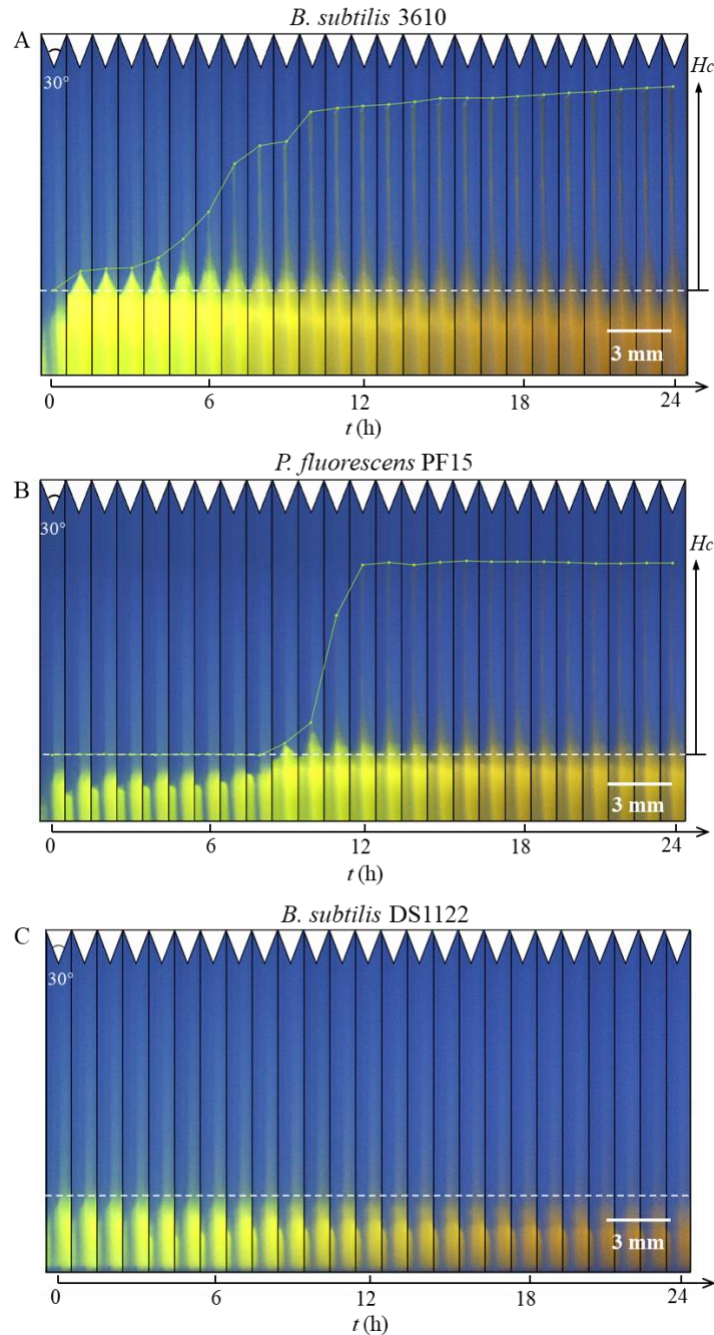

134

135 **FIG 2** Time-lapse images of corner flow at the 30° corners during a 24-hour bacterial growth period for  
136 (A) surfactant-producing strain *B. subtilis* 3610, (B) surfactant-producing strain *P. fluorescens* PF15,  
137 and (C) surfactant-deficient strain *B. subtilis* DS1122. Images were cropped at the 30° corner from time  
138 sequence images of the chamber with 4 different angles (30°, 60°, 90° and 120°) shown in Fig. 1B. The  
139 white dotted horizontal lines represent the initial height of bacterial culture in the chamber at growth



140 time  $t = 0$  h. The green lines were added to the image to indicate the tip positions of the corner flows  
141 over time. The green color of the bacterial solution is from the 0.005% fluorescein sodium salt added to  
142 the bacterial culture. The color of bacterial culture in the chamber gradually turned from bright green to  
143 dark yellow due to the increase in bacteria cell density which makes the solution turbid. Note that the  
144 contrast and brightness of the figures have been enhanced to increase the visibility of corner flow. The  
145 videos of corner flow development with original color are shown in Movie S1, Movie S2 and Movie  
146 S3.

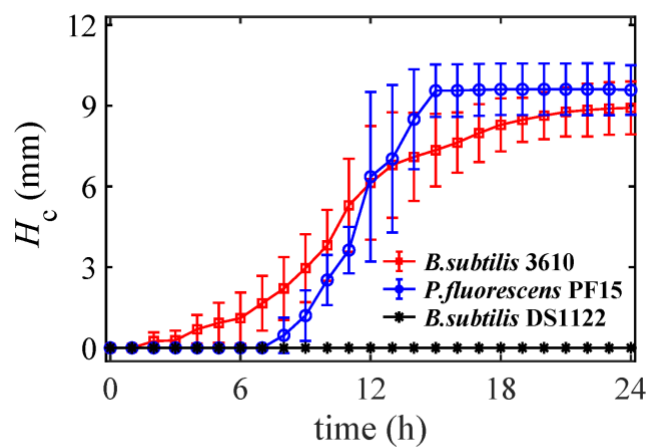

147

148 **FIG 3** The time evolution of the tip position of corner flows at the  $30^\circ$  corner for *B. subtilis* 3610 (WT),  
149 *B. subtilis* DS1122 (defective in surfactin) and *P. fluorescens* PF15.  $H_c$  indicates the tip position of the  
150 corner flow from its initial position (shown in Fig. 2). The error bars represent the standard error of  
151 measurements of six to seven replicates experiments for each strain.

152 **Contact angle and the critical corner angle for bacterial corner flows.** To  
153 demonstrate how bacteria-produced biosurfactants generate corner flows, we measured the  
154 optical density  $OD_{600}$  and surfactant-related properties, including surface tension ( $\gamma$ ) and  
155 contact angle ( $\theta_c$ ), of the bacterial solution over time. Note that because the volume of the  
156 bacterial solution in the PDMS chamber was not sufficient for these measurements, we

157 used bacterial solution grown in 50-mL tubes under identical oxygen, nutrient, and  
158 temperature conditions as in the PDMS chamber for measurements. For *B. subtilis* 3610  
159 and *P. fluorescens* PF15,  $\theta_c$  and  $\gamma$  decreased gradually beginning at  $t = 4$  h and  $t = 6$  h,  
160 respectively. At the beginning of experiments  $t = 0$  h, the contact angle of the bacterial  
161 solution on the PDMS surface was  $\theta_c \approx 115^\circ$  for all strains, because the solution was similar  
162 to water, whose contact angle on PDMS is about  $117^\circ$ <sup>29</sup>. At  $t = 16$  h, the wettability of  
163 PDMS for both strains, i.e., *B. subtilis* 3610 and *P. fluorescens* PF15, changed from initially  
164 non-wetting ( $\theta_c \approx 115^\circ$ ) to wetting ( $\theta_c \approx 60^\circ$ ). In comparison, for the surfactant-deficient  
165 strain *B. subtilis* DS1122, despite a slight decrease in surface tension  $\gamma$ , the contact angle  
166  $\theta_c$  of the bacterial solution on the solid surface remained above  $90^\circ$ , thus the surface  
167 remained non-wetting. For the surfactant-producing strain *B. subtilis* 3610,  $\theta_c$  dropped  
168 from  $115^\circ$  (nonwetting) to  $60^\circ$  (wetting) during  $t = 4$  to 17 hours (Fig. 5A), which started  
169 earlier than *P. fluorescens*, for which  $\theta_c$  dropped during  $t = 6$  to 17 hours (Fig. 5B).  
170 Consistently, as shown in Fig. 3, the beginning time of corner flows in chambers for *B.*  
171 *subtilis* 3610 was around  $t = 2$  h, earlier than the start time of the corner flow of *P.*  
172 *fluorescens*, which is around  $t = 7$  h. The start time of corner flow and the time when the  
173 contact angle starts to change for *B. subtilis* and *P. fluorescens* are similar, suggesting that  
174 the bacterial corner flow was indeed caused by the surfactant-induced change in the contact  
175 angle of the solution on surfaces.

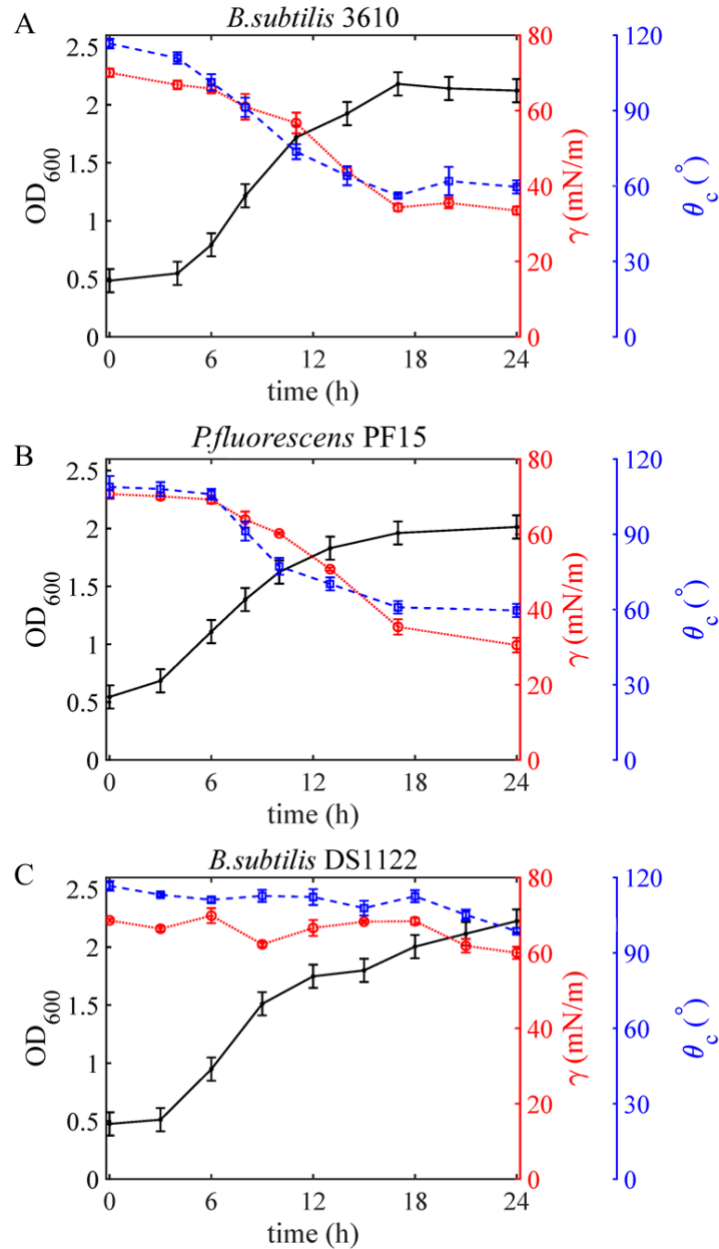

176

177 **FIG 4** The time evolution of the advancing dynamic contact angle  $\theta_c$  on the PDMS surface, the surface  
178 tension  $\gamma$ , and the cell density OD<sub>600</sub> of bacterial solutions for *B. subtilis* 3610 (WT), *B. subtilis* DS1122  
179 (defective in surfactin) and *P. fluorescens* PF15, separately. The error bars represent the standard error  
180 of measurements of 3 to 4 liquid drops.

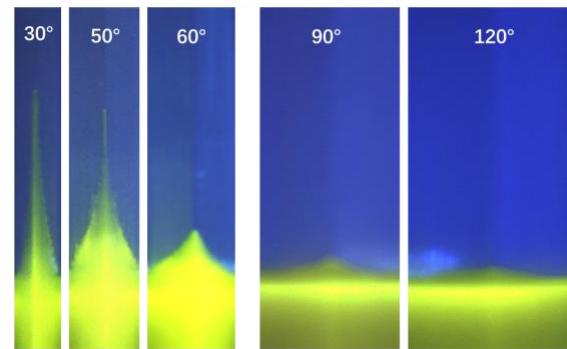

181

182 **FIG 5** Image of solutions containing *B. subtilis* 3610 cells along with five different corners after 20-  
183 hour growth period. The initial bacteria density was  $OD_{600} \approx 0.5 \pm 0.1$ . The first three images with  
184 corners of  $30^\circ$ ,  $50^\circ$ ,  $60^\circ$  were cropped from one chamber (see *Supporting Information*), and the last two  
185 images with corners of  $90^\circ$ ,  $120^\circ$  were cropped from the chamber shown in Fig. 1.

186 Next, we show that the critical corner angle for bacteria to generate corner flow can  
187 be predicted from the contact angle of bacterial solution on surfaces. According to classical

188 corner flow theory, e.g., Concus–Finn criterion<sup>30</sup>, corner flow occurs when  $\frac{\alpha}{2} + \theta_c < \frac{\pi}{2}$

189 (where  $\alpha$  is the corner angle and  $\theta_c$  is contact angles). For *B. subtilis* 3610, after bacteria  
190 produced sufficient surfactants, the advancing contact angle on the PDMS surface reduced  
191 to around  $60^\circ$  as shown in Fig. 4A, so the predicted critical corner for corner flow is

192  $\alpha_{ih} = 2 \times (\pi / 2 - \theta_{\min}) = 2 \times (90^\circ - 60^\circ) = 60^\circ$ . We prepared PDMS chambers which contain

193 interior corners of different degrees of  $30^\circ$ ,  $50^\circ$ ,  $60^\circ$ ,  $90^\circ$  and  $120^\circ$ . And we transferred 600  
194 – 800  $\mu\text{L}$  bacterial culture at  $OD_{600}$  between  $0.5 \pm 0.1$  into a chamber and imaged the

195 position of the bacterial solution over 24 hours. During the experiments, we observed

196 noticeable corner flows along corners with  $30^\circ$  and  $50^\circ$  corners, but no fluid rises along  $90^\circ$

197 or  $120^\circ$  corners. As for  $60^\circ$  corners, a slight rise occurs. These experimental results suggest

198 that the critical corner angle for *B. subtilis* is about  $60^\circ$ , which is consistent with the  
199 predicted critical corner angle  $\alpha_{th} = 60^\circ$  calculated by classic corner flow theory. For *P.*  
200 *fluorescens* which also reduced the contact angle to  $60^\circ$ , so the predicted critical corner  
201 angle is also  $\alpha_{th} = 60^\circ$ . Our experiments in the chamber with 4 different angles ( $30^\circ$ ,  $60^\circ$ ,  
202  $90^\circ$  and  $120^\circ$ ) (see *Supporting Information* Video) also show corner flows at  $30^\circ$  corner  
203 but no fluid rise in  $90^\circ$  or  $120^\circ$  corners. A slight rise at the  $60^\circ$  corner was also observed,  
204 indicating the critical corner angle for *P. fluorescens* is also about  $60^\circ$ . The agreement of  
205 the predicted and the observed critical corner angle for both surfactant-producing bacteria,  
206 *B. subtilis* and *P. fluorescens*, further confirms that the bacterial corner flow is due to and  
207 can be predicted by biosurfactant-induced changes in contact angle.

208 **Surfactant concentration and corner flows.** Next, we investigate the concentration  
209 of surfactants produced by bacteria that can generate corner flows. Specifically, we repeat  
210 the corner flow experiments using various concentrations of commercially-available  
211 surfactants rhamnolipid (Sigma) and surfactin (Sigma), which are the surfactants produced  
212 by *P. fluorescens*<sup>31,32</sup> and *B. subtilis*<sup>33,34</sup>, respectively. Here, we measured the surface  
213 tension and contact angle of surfactant solutions at different concentrations and transferred  
214 surfactant solutions into chambers to observe the rise of corner flow at the  $30^\circ$  corner. As  
215 the surfactant concentration increases, the contact angle of the liquid decreases and corner  
216 flows start to occur. As shown in Fig. 6, the surface tension  $\gamma$  and contact angle  $\theta_c$  for  
217 surfactin and rhamnolipid solutions dropped rapidly when the concentration was in the  
218 range of  $1 \times 10^{-5}$  -  $1 \times 10^{-4}$  M and  $1 \times 10^{-5}$  -  $1 \times 10^{-2}$  M, respectively.  $\gamma$  and  $\theta_c$  were  
219 determined from the shape of pedant droplet and the angle of moving droplet as shown in

220 the insets of Fig. 6 (see Methods for details). Corner flows were only observed when the  
221 surfactant concentration was higher than the critical value, which for surfactin is about  $2 \times$   
222  $10^{-5}$  -  $3 \times 10^{-5}$  M and for rhamnolipid is about  $1 \times 10^{-4}$  -  $3 \times 10^{-4}$  M.

223 Note that both the corner flows generated by pure bacterial surfactants reached above  
224 12 mm, which is higher than the height of corner flow (9 mm) generated by bacteria culture.  
225 We hypothesize that the smaller corner height for bacterial solution is caused by the  
226 evaporation of bacteria solution during 24-hour growth period.

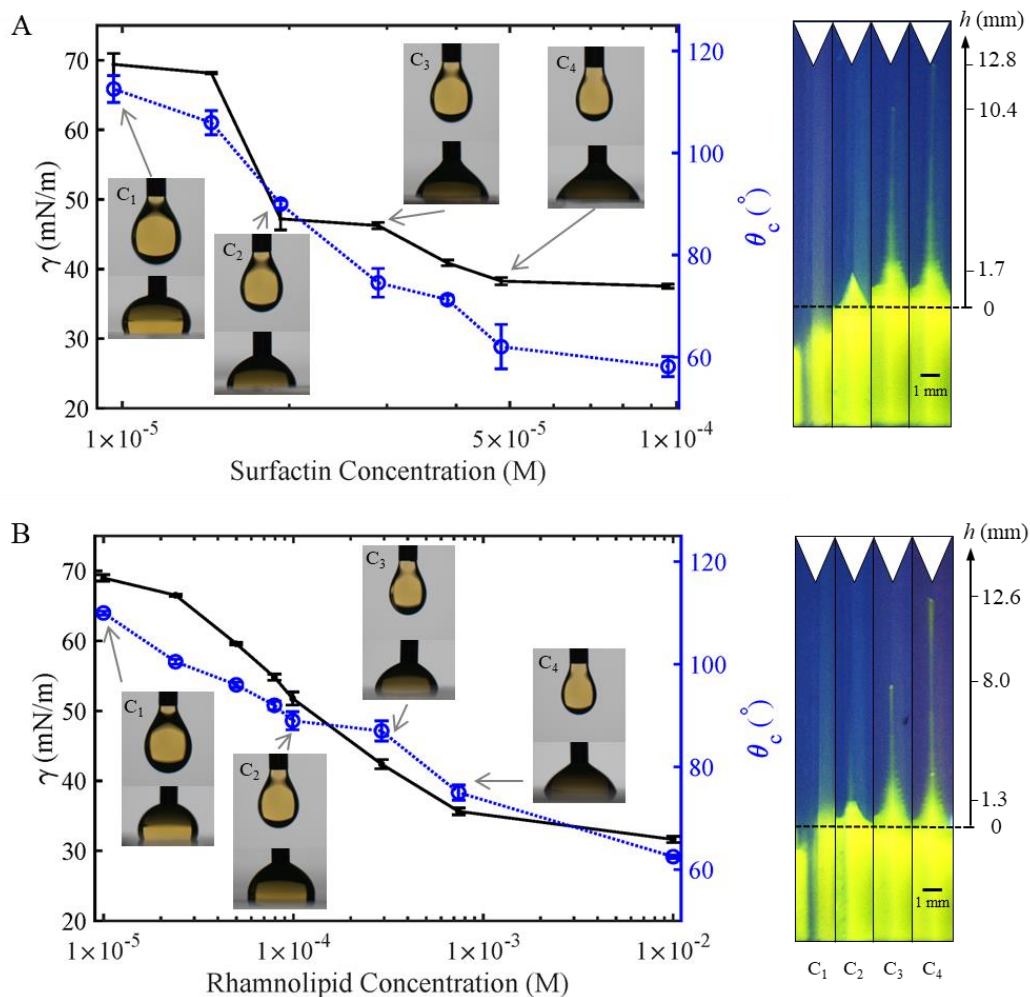

227

228 **FIG 6** The surface tension  $\gamma$  and contact angle  $\theta_c$  for pure surfactin solution (A) and rhamnolipid  
229 (B) at different concentrations. The insets show examples of pedant droplet used to measure surface

230 tension and moving droplets to measure contact angle (see Methods for details). The right image shows  
231 the corner flow generated by the surfactants at different surfactant concentrations ( $C_1$ ,  $C_2$ ,  $C_3$ ,  $C_4$ )  
232 indicated on the left figures.

233 **Maximum height of corner flow.** During our experiments, we observed that tip of  
234 corner flows generated by *B. subtilis* 3610 and *P. fluorescens* PF15 at the  $30^\circ$  corner  
235 stopped reached a maximum height,  $h_{max} \approx 9$  mm, as shown in Fig. 3. However, corner  
236 flows can rise to infinite height theoretically if the corner is perfectly sharp<sup>35,36</sup>. We  
237 hypothesize that the maximum corner flow height is related to the roundness or cutoff of  
238 the corner, because corners can hardly be perfectly sharp<sup>37,38</sup>. The microscopic image of  
239 the  $30^\circ$  corner (Fig. 7B) shows that the corner in our experiments, due to the resolution of  
240 our 3D printing (see *Methods* for details), is rounded with step-like structures along its  
241 inner surface, as shown in Fig. 7C.

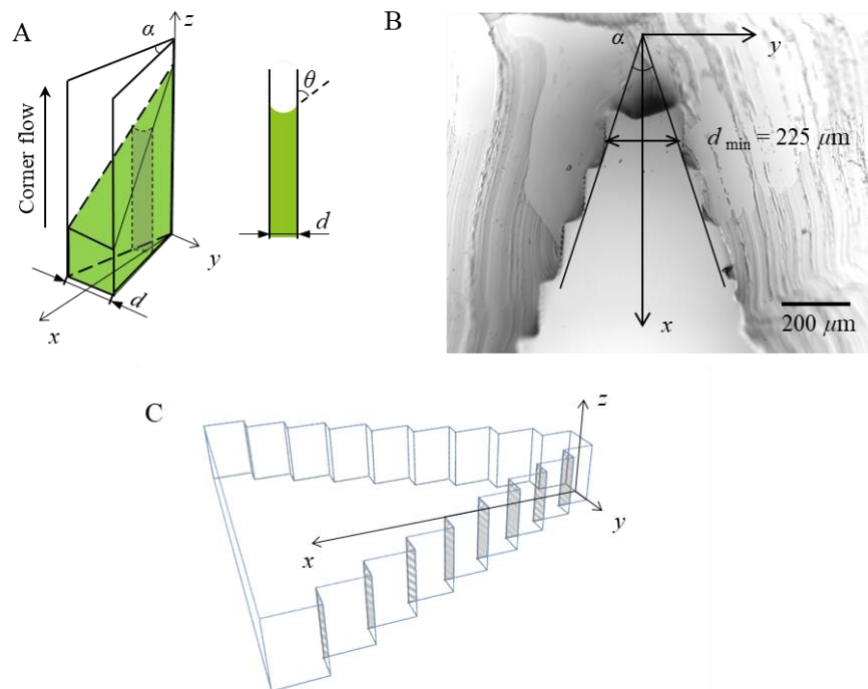

242

243 **FIG 4** (A) A schematic diagram of the upward flow of the bacterial solution (green) along a 30° corner.  
244 A cross-sectional image parallel to the (y, z)-plane is shown at the right.  $\theta_c$  is the contact angle,  $\alpha$  is the  
245 corner angle,  $d$  is the local separation changing with the distance  $x$ . (B) Confocal image of the cross-  
246 section of the 30° corner of the PDMS chamber, the minimum separation in the tip position is 225  $\mu\text{m}$ .  
247 (C) A schematic of the step-like structures of the 30° corner.

248 To estimate the maximum height of corner flow along the rounded corner, here we  
249 use a simple fluid mechanics theory developed for pure wetting liquid<sup>39,40</sup>. The following  
250 assumptions were made<sup>41,42</sup>: (i) the motion of the fluid is mainly vertical and dominated by  
251 the curvature in the (y, z) - plane and the constant capillary pressure can be calculated from  
252 the contact angle  $\theta_c$ ; and (ii) evaporation of liquid, friction, and inertial effects are not  
253 considered. Imagine that the two plates that form the corner are composed of many parallel  
254 plates with different distances  $d$  apart, e.g., consists of step-like structures in the inner  
255 surface of the chamber (Fig. 7C). The fluid meets the container wall with a prescribed  
256 contact angle  $\theta_c$ . The weight of liquid that rises vertical distance  $h$  by a segment of the wall  
257 off length  $l$  between two parallel walls with distance  $d$ , is  $F_g = \rho g d h l$ , where  $g$  is the free-  
258 fall acceleration,  $\rho$  is the liquid density. The capillary force due to surface tension of the  
259 liquid between two parallel plates can be derived using Young-Laplace equation<sup>43</sup>,  $F_\sigma =$   
260  $2l\gamma\cos\theta_c$ . Due to force balance, the capillary driving forces ( $F_\sigma$ ) equal to the gravitational  
261 force ( $F_g$ ), thus the maximum height of the liquid rise is:

262 
$$h = \frac{2\gamma \cos \theta_c}{\rho g d}$$

263 From the microscopic image of the corner (Fig. 7B), the minimum width at the tip of  
264 the corner is  $d = 225 \mu\text{m}$ , which is the minimum width of a series of parallel plates.



265 Substituting  $\theta_c = 60^\circ$ ,  $\gamma = 30$  mN/m,  $\rho = 1000$  kg/m<sup>3</sup> and  $d = 225$   $\mu$ m into above equation,  
266 we found  $h = 13.6$  mm. Consistently, our experiment results show that the maximum  
267 height of the corner flow at  $30^\circ$  corner is 9 mm for the two surfactant-producing bacteria  
268 considered here, which is the same order of magnitude as our theoretical derivation,  
269 suggesting that the maximum height of corner flow is indeed limited by the roundness of  
270 the corner.

## 271 Discussion

272 We demonstrate that typical biosurfactant-producing soil bacteria, Wild-Type  
273 *Bacillus subtilis* and *Pseudomonas fluorescens*, can self-generate flows along sharp corners  
274 with corner angle less than  $60^\circ$ . We show that a surfactant-deficient mutant of *Bacillus*  
275 *subtilis* did not generate the corner flow, thus bacterial motility is not needed for bacteria  
276 to generate corner flows. The speed of corner flows shown is on the order of millimeters  
277 per hour, similar to bacteria swarming, the fastest mode of known bacterial surface  
278 translocation<sup>44,45</sup>. Further, we show that the bacterial corner flow was generated by  
279 surfactant-induced change in contact angle of the bacterial solution on the solid surface,  
280 and the critical corner angle to generate corner flow can be predicted by the contact angle.  
281 Finally, we demonstrate that the maximum height of bacterial corner flow can be predicted  
282 by the corner geometry, i.e., the roundness or cutoff length of the corners. We anticipate  
283 that the bacterial corner flow revealed in this study is prevalent in soil where biosurfactant-  
284 producing bacteria<sup>46,47</sup> and angular pores<sup>48–50</sup> are common<sup>51</sup>. Our results also suggest that  
285 both bacteria-produced surfactants and the geometry of the soil pore network should be  
286 considered in predicting biosurfactant-induced corner flows and bacterial spreading. The  
287 mathematical description of biosurfactant-driven flow developed in this study will help

288 improve predictions of bacteria transport in soil and facilitate designs of soil-based  
289 bioremediation projects.

## 290 **Materials and Methods**

291 **Bacterial Strains and Growth.** The bacterial strains used in the present study were  
292 *Bacillus subtilis* 3610 (Wild-type), *Bacillus subtilis* DS1122 and *Pseudomonas fluorescens*  
293 PF15. Strain cells were streaked from - 80°C freezer stocks onto an LB Medium plate (1.5%  
294 agar). *P. fluorescens* and *B. subtilis* were grown at 30°C or 37°C, respectively.

295 **Bacterial Solution.** 5 mL of LB liquid medium were inoculated with cells from an  
296 isolated colony on the plate into a 50-mL tube. The LB medium inoculated with *B. subtilis*  
297 was incubated on a shaker at 37°C, 200 rpm, and the LB medium inoculated with *P.*  
298 *fluorescens* was placed on a shaker at 30°C, 200 rpm overnight. The bacterial overnight  
299 cultures were subjected to centrifugation at 4,000 rpm for 10 minutes. Afterward, we  
300 removed the supernatant and diluted the bacterial cells at the bottom of the tube with M9  
301 medium and mixed them using a vortex mixer. The cell density of culture was diluted to  
302  $OD_{600} = 0.5 \pm 0.1$  by tuning the volume of M9 medium. The M9 medium used in this study  
303 was supplemented with  $0.03 \mu\text{M}$   $(\text{NH}_4)_6(\text{M}_07)_{24} \cdot 4\text{H}_2\text{O}$ ,  $4 \mu\text{M}$   $\text{H}_3\text{BO}_3$ ,  $0.3 \mu\text{M}$   $\text{CoCl}_2 \cdot 6\text{H}_2\text{O}$ ,  
304  $0.1 \mu\text{M}$   $\text{CuSO}_4 \cdot 5\text{H}_2\text{O}$ ,  $0.8 \mu\text{M}$   $\text{MnCl}_2 \cdot 4\text{H}_2\text{O}$ ,  $0.1 \mu\text{M}$   $\text{ZnSO}_4 \cdot 7\text{H}_2\text{O}$ ,  $0.1 \mu\text{M}$   $\text{FeSO}_4 \cdot 7\text{H}_2\text{O}$   
305 and 2% glucose. When noted, 0.005% (w/v) fluorescein sodium salt was added.

306 **3D-Printed Molds Preparation and Fabrication of the PDMS Slabs.** We use 3D-  
307 printed molds to produce the PDMS slabs used in the experiment. The mold is composed  
308 of a cuboid (30 mm  $\times$  25mm  $\times$  4 mm) and four triangular prisms (the image of the mold is  
309 shown in *Supporting Information*). The heights of the cross-sections of these triangular

310 prisms are all 3 mm. The mold with four different angles was printed by a 3D printer  
311 (Anycubic Photon Mono X) using a 405nm UV resin (Anycubic). The printed molds  
312 cannot be directly used for PDMS casting because chemicals released from 3D-printed  
313 objects will inhibit PDMS curing in the vicinity of these objects<sup>52</sup>. So before casting, the  
314 printed mold was UV post-curing for 20 minutes, immersed in isopropanol for 6 hours,  
315 then treated with air plasma corona (BD-20AC) for 1 min, and then silanized using  
316 triethoxy (1H, 1H, 2H, 2H-perfluoro-1-octyl) silane for 3 h. Then the mold was transferred  
317 to a petri dish and a 10:1 w/w base/curing agent PDMS liquid was poured onto the 3D  
318 printed mold. The composite was cured in a hotplate at 80 °C for at least 2 hours.

319 **Corner Flow Experiment.** For the corner flows experiment, a sterilized PDMS  
320 chamber was placed in an incubator with a transparent front door. We transferred 600 –  
321 800  $\mu\text{L}$  prepared bacterial culture at  $\text{OD}_{600} = 0.5 \pm 0.1$  into the PDMS chamber using a 3-  
322 mL syringe. The incubator was set to the temperature of  $37 \pm 2$  °C for *B. subtilis* and  $30 \pm$   
323  $2$ °C for *P. fluorescens*, and relative humidity was kept at  $80 \pm 10\%$ . To visualize the  
324 bacterial-induced corner flow, a blue LED light was placed in the incubator and the M9  
325 medium containing fluorescent 2-NBDG glucose to make the slim corner flow visible. A  
326 digital camera (Blackfly S BFS USB3, Teledyne FLIR) was placed in front of the chamber  
327 and set to take photos at 2 mins intervals for 24 hours. The length of corner flow was  
328 measured from the initial reservoir level to the top of corner flow.

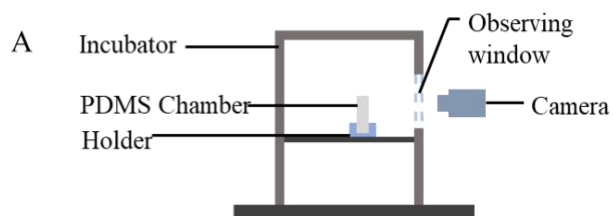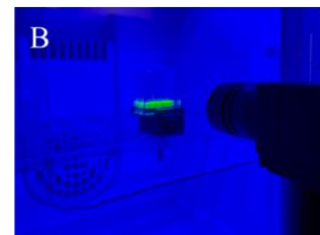

329

330 **FIG 8** (A) A schematic diagram of the bacterial corner flow experimental setup. (B) An image of the  
331 experimental setup for the bacterial corner flow experiments.

332 **Contact Angle and Surface Tension Measurements.** To quantify the biosurfactant  
333 related parameters, we measured the time evolution of contact angle  $\theta_c$ , surface tension  $\gamma$ ,  
334 and bacterial cell density ( $OD_{600}$ ) over time for 24 hours. Due to the limited volume of  
335 bacterial solution in the PDMS chamber, we grow bacterial solution in tubes to mimic the  
336 growth of bacteria in chambers. We diluted overnight bacterial culture to  $OD_{600} = 0.5 \pm 0.1$   
337 and separated the uniform culture by transferring 5 mL aliquots into multiple 50-mL  
338 centrifuge tubes. We placed the tubes containing 5 mL cultures ( $OD_{600} = 0.5 \pm 0.1$ ) in a  
339 shaking incubator. Specifically, the temperature was set to  $37^\circ\text{C}$  for *B. subtilis* and  $30^\circ\text{C}$   
340 for *P. fluorescens*. For each data point in Fig. 5, we removed one tube from the incubator  
341 and transferred 1 mL bacterial culture to a cuvette and measured the  $OD_{600}$ . Because we  
342 split the 24-hour continuous monitoring into two 12-hour periods and the initial  $OD_{600}$  was  
343 diluted to  $0.5 \pm 0.1$ , the error bar/uncertainty of each  $OD_{600}$  data point was set to 0.1.

344 To measure surface tension  $\gamma$  and contact angle  $\theta_c$ , bacteria culture was centrifuged at  
345 4,000 rpm for 10 minutes and the supernatant was filtered through a  $0.2\text{-}\mu\text{m}$  filter to remove  
346 bacterial cells. Afterward, we transferred the filtered solution into a 10-mL syringe with an  
347 18-gauge needle. We placed the syringe on a syringe pump connected to a needle and a  
348 drop of the solution was pushed out of the needle. To measure surface tension  $\gamma$ , the shape  
349 of the pendant drops below the needle was recorded and the profile of the droplet edge was  
350 fitted using the MATLAB code developed by the Stone group based on the algorithm  
351 proposed by Rotenberg et al.<sup>53</sup>. To measure the advancing contact angle  $\theta_c$ , we injected  
352 bacterial solution to the surface of a PDMS slab and imaged the shape of the advancing

353 drop using the syringe pump at a 1.2 mL/hour flow rate. After identifying the edges of the  
354 moving drops, we estimated  $\theta_c$  as the angle between the PDMS surface and the tangent line  
355 of the drop edge near the contact line. Examples of pendant drop and advancing drop are  
356 shown in the *Supporting Information*.

357 **Data Availability.** The MATLAB codes for image processing and the estimation of  
358 surface tension and contact angle have already shared by J Yang on GitHub:  
359 [https://github.com/JudyQYang/Bacterial\\_corner\\_flow\\_codes](https://github.com/JudyQYang/Bacterial_corner_flow_codes). All other study data were  
360 extracted from the Supplementary Movies and are available from the corresponding  
361 authors on reasonable requests.

## 362 **Acknowledgements**

363 This research was supported by J Yang's startup fund. L Yuan was supported by the  
364 fellowship of Civil, Environmental, and Geo-Engineering at the University of Minnesota.  
365 J Sanfilippo was supported by a NIH K22 grant 5K22AI151263-02. We thank Mohamed  
366 Donia (Princeton University) for giving us the bacterial strain *Pseudomonas fluorescens*  
367 PF15.

## 368 **References**

- 369 1. Liang, C., Schimel, J. P. & Jastrow, J. D. The importance of anabolism in microbial  
370 control over soil carbon storage. *Nature Microbiology* **2**, 17105 (2017).
- 371 2. Trivedi, P., Anderson, I. C. & Singh, B. K. Microbial modulators of soil carbon storage:  
372 integrating genomic and metabolic knowledge for global prediction. *Trends in*  
373 *Microbiology* **21**, 641–651 (2013).

- 374 3. Jean-Baptiste, R., Karen, J., Beatriz, D., M, H. S. & A, C. D. Microbial Biogeochemical  
375 Cycling of Nitrogen in Arid Ecosystems. *Microbiology and Molecular Biology Reviews*  
376 **0**, e00109-21 (2022).
- 377 4. Long, P. E., Williams, K. H., Hubbard, S. S. & Banfield, J. F. Microbial Metagenomics  
378 Reveals Climate-Relevant Subsurface Biogeochemical Processes. *Trends in*  
379 *Microbiology* **24**, 600–610 (2016).
- 380 5. Yang, P. & van Elsas, J. D. Mechanisms and ecological implications of the movement  
381 of bacteria in soil. *Applied Soil Ecology* **129**, 112–120 (2018).
- 382 6. Tufenkji, N. Modeling microbial transport in porous media: Traditional approaches and  
383 recent developments. *Advances in Water Resources* **30**, 1455–1469 (2007).
- 384 7. Ginn, T. R. *et al.* Processes in Microbial Transport in the Natural Subsurface.  
385 *ChemInform* **34**, no-no (2003).
- 386 8. Smith, M. S., Thomas, G. W. & White, R. E. Movement of Bacteria Through  
387 Macropores to Ground Water. *KWRRI Research Reports* (1983)  
388 doi:<https://doi.org/10.13023/kwrri.rr.139>.
- 389 9. Dehkharghani, A., Waisbord, N. & Guasto, J. S. *Self-transport of swimming bacteria is*  
390 *impaired by porous microstructure*.
- 391 10. Bai, G., Brusseau, M. L. & Miller, R. M. Influence of a rhamnolipid biosurfactant on  
392 the transport of bacteria through a sandy soil. *Applied and Environmental Microbiology*  
393 **63**, 1866–1873 (1997).

- 394 11. Zhong, H. *et al.* Effect of low-concentration rhamnolipid on transport of *Pseudomonas*  
395 *aeruginosa* ATCC 9027 in an ideal porous medium with hydrophilic or hydrophobic  
396 surfaces. *Colloids and Surfaces B: Biointerfaces* **139**, 244–248 (2016).
- 397 12. Yang, J. Q. *et al.* Evidence for biosurfactant-induced flow in corners and bacterial  
398 spreading in unsaturated porous media. *Proc Natl Acad Sci U S A* **118**, (2021).
- 399 13. Angelini, T. E., Roper, M., Kolter, R., Weitz, D. A. & Brenner, M. P. *Bacillus subtilis*  
400 spreads by surfing on waves of surfactant. *Proc Natl Acad Sci U S A* **106**, 18109–18113  
401 (2009).
- 402 14. Nitschke, M. & Pastore, G. M. Production and properties of a surfactant obtained from  
403 *Bacillus subtilis* grown on cassava wastewater. *Bioresource Technology* **97**, 336–341  
404 (2006).
- 405 15. Nielsen, T. H., Christophersen, C., Anthoni, U. & Sørensen, J. Viscosinamide, a new  
406 cyclic depsipeptide with surfactant and antifungal properties produced by *Pseudomonas*  
407 *fluorescens* DR54. *J Appl Microbiol* **87**, 80–90 (1999).
- 408 16. T, de S. J., Marjan, de B., Pieter, de W., A, van B. T. & M, R. J. Biochemical, Genetic,  
409 and Zoosporicidal Properties of Cyclic Lipopeptide Surfactants Produced by  
410 *Pseudomonas fluorescens*. *Applied and Environmental Microbiology* **69**, 7161–7172  
411 (2003).
- 412 17. Janek, T., Łukaszewicz, M. & Krasowska, A. Identification and characterization of  
413 biosurfactants produced by the Arctic bacterium *Pseudomonas putida* BD2. *Colloids*  
414 *and Surfaces B: Biointerfaces* **110**, 379–386 (2013).

- 415 18. Tuleva, B. K., Ivanov, G. R. & Christova, N. E. Biosurfactant production by a new  
416 *Pseudomonas putida* strain. *Zeitschrift fur Naturforschung - Section C Journal of*  
417 *Biosciences* **57**, 356–360 (2002).
- 418 19. Xiao-ying, G., Chun-e, H., Tao, L. & Zhu, O. Effect of *Bacillus subtilis* and  
419 *Pseudomonas fluorescens* on Growth of Greenhouse Tomato and Rhizosphere  
420 Microbial Community. *Journal of Northeast Agricultural University (English Edition)*  
421 **22**, 32–42 (2015).
- 422 20. Earl, A. M., Losick, R. & Kolter, R. Ecology and genomics of *Bacillus subtilis*. *Trends*  
423 *Microbiol* **16**, 269 (2008).
- 424 21. Marshall, D. C., Arruda, B. E. & Silby, M. W. Alginate genes are required for optimal  
425 soil colonization and persistence by *Pseudomonas fluorescens* Pf0-1. *Access*  
426 *Microbiology* **1**, (2019).
- 427 22. Whang, L. M., Liu, P. W. G., Ma, C. C. & Cheng, S. S. Application of biosurfactants,  
428 rhamnolipid, and surfactin, for enhanced biodegradation of diesel-contaminated water  
429 and soil. *J Hazard Mater* **151**, 155–163 (2008).
- 430 23. Mulligan, C. N. Environmental applications for biosurfactants. *Environ Pollut* **133**,  
431 183–198 (2005).
- 432 24. Rodrigues, L., Banat, I. M., Teixeira, J. & Oliveira, R. Biosurfactants: potential  
433 applications in medicine. *Journal of Antimicrobial Chemotherapy* **57**, 609–618 (2006).
- 434 25. Meena, K. R. & Kanwar, S. S. Lipopeptides as the antifungal and antibacterial agents:  
435 applications in food safety and therapeutics. *Biomed Res Int* **2015**, 473050 (2015).



- 436 26. Desmyttere, H. *et al.* Antifungal Activities of Bacillus subtilis Lipopeptides to Two  
437 Venturia inaequalis Strains Possessing Different Tebuconazole Sensitivity. *Frontiers in*  
438 *Microbiology* **10**, (2019).
- 439 27. Q, Y. J. *et al.* Evidence for biosurfactant-induced flow in corners and bacterial  
440 spreading in unsaturated porous media. *Proceedings of the National Academy of*  
441 *Sciences* **118**, e2111060118 (2021).
- 442 28. Kearns, D. B. & Losick, R. Swarming motility in undomesticated Bacillus subtilis.  
443 *Molecular Microbiology* **49**, 581–590 (2003).
- 444 29. Chuah, Y. J. *et al.* Simple surface engineering of polydimethylsiloxane with  
445 polydopamine for stabilized mesenchymal stem cell adhesion and multipotency.  
446 *Scientific Reports 2015 5:1* **5**, 1–12 (2015).
- 447 30. Concus, P. & Finn, R. ON THE BEHAVIOR OF A CAPILLARY SURFACE IN A  
448 WEDGE. *Proceedings of the National Academy of Sciences* **63**, 292–299 (1969).
- 449 31. Wilson, N. G. & Bradley, G. The effect of immobilization on rhamnolipid production  
450 by Pseudomonas fluorescens. *Journal of Applied Bacteriology* **81**, 525–530 (1996).
- 451 32. Vasileva-Tonkova, E., Sotirova, A. & Galabova, D. The Effect of Rhamnolipid  
452 Biosurfactant Produced by Pseudomonas fluorescens on Model Bacterial Strains and  
453 Isolates from Industrial Wastewater. *Current Microbiology* **62**, 427–433 (2011).
- 454 33. Cooper, D. G., Macdonald, C. R., Duff, S. J. & Kosaric, N. Enhanced Production of  
455 Surfactin from Bacillus subtilis by Continuous Product Removal and Metal Cation  
456 Additions. *Appl Environ Microbiol* **42**, 408–412 (1981).

- 457 34. Janek, T. *et al.* Sustainable Surfactin Production by *Bacillus subtilis* Using Crude  
458 Glycerol from Different Wastes. *Molecules* **26**, 3488 (2021).
- 459 35. Zhou, J. & Doi, M. Universality of capillary rising in corners. *Journal of Fluid*  
460 *Mechanics* **900**, 29–29 (2020).
- 461 36. Li, J., Chen, X. & Huang, Y. The Review of the Interior Corner Flow Research in  
462 Microgravity. *Procedia Engineering* **31**, 331–336 (2012).
- 463 37. Chen, Y., Weislogel, M. M. & Nardin, C. L. Capillary-driven flows along rounded  
464 interior corners. *Journal of Fluid Mechanics* **566**, 235–271 (2006).
- 465 38. Kitron-Belinkov, M., Marmur, A., Trabold, T. & Dadheech, G. V. Groovy drops:  
466 Effect of groove curvature on spontaneous capillary flow. *Langmuir* **23**, 8406–8410  
467 (2007).
- 468 39. Piva, M., Piva & M. Capillary Rise in a Wedge. *PhTea* **47**, 528–530 (2009).
- 469 40. Higuera, F. J., Medina, A. & Liñán, A. Capillary rise of a liquid between two vertical  
470 plates making a small angle. *Physics of Fluids* **20**, (2008).
- 471 41. Fries, N. & Dreyer, M. An analytic solution of capillary rise restrained by gravity.  
472 *Journal of Colloid and Interface Science* **320**, 259–263 (2008).
- 473 42. Deng, D., Tang, Y., Zeng, J., Yang, S. & Shao, H. Characterization of capillary rise  
474 dynamics in parallel micro V-grooves. *International Journal of Heat and Mass Transfer*  
475 **77**, 311–320 (2014).
- 476 43. Bhatnagar, R. & Finn, R. The Laplace Parallel Plates Problem in Capillarity Theory.  
477 *Journal of Mathematical Fluid Mechanics* **20**, 1681–1699 (2018).

- 478 44. Deforet, M., van Ditmarsch, D., Carmona-Fontaine, C. & Xavier, J. B. Hyperswarming  
479 adaptations in a bacterium improve collective motility without enhancing single cell  
480 motility. *Soft Matter* **10**, 2405–2413 (2014).
- 481 45. Yan, J., Monaco, H. & Xavier, J. B. The Ultimate Guide to Bacterial Swarming: An  
482 Experimental Model to Study the Evolution of Cooperative Behavior. *Annu Rev*  
483 *Microbiol* **73**, 293–312 (2019).
- 484 46. Youssef, N. H. *et al.* Comparison of methods to detect biosurfactant production by  
485 diverse microorganisms. *Journal of Microbiological Methods* **56**, 339–347 (2004).
- 486 47. Jimoh, A. A. & Lin, J. Biosurfactant: A new frontier for greener technology and  
487 environmental sustainability. *Ecotoxicology and Environmental Safety* **184**, 109607  
488 (2019).
- 489 48. Tuller, M. & Or, D. Hydraulic conductivity of variably saturated porous media: Film  
490 and corner flow in angular pore space. *Water Resources Research* **37**, 1257–1276 (2001).
- 491 49. Tuller, M., Dani, O. & Dudley, L. M. Adsorption and capillary condensation in porous  
492 media: Liquid retention and interfacial configurations in angular pores. *Water*  
493 *Resources Research* **35**, 1949–1964 (1999).
- 494 50. Ebrahimi, A. N. & Or, D. Microbial dispersal in unsaturated porous media:  
495 Characteristics of motile bacterial cell motions in unsaturated angular pore networks.  
496 *Water Resources Research* **50**, 7406–7429 (2014).
- 497 51. Tuller, M. & Or, D. Hydraulic conductivity of variably saturated porous media: Film  
498 and corner flow in angular pore space. *Water Resources Research* **37**, 1257–1276 (2001).

499 52. Venzac, B. *et al.* PDMS Curing Inhibition on 3D-Printed Molds: Why? Also, How to  
500 Avoid It? *Analytical Chemistry* **93**, 7180–7187 (2021).

501 53. Rotenberg, Y., Boruvka, L. & Neumann, A. W. Determination of surface tension and  
502 contact angle from the shapes of axisymmetric fluid interfaces. *Journal of Colloid and*  
503 *Interface Science* **93**, 169–183 (1983).

504
